# Supplementary material for: Who Facilitated Misreporting in Securitized Loans?
Source: Oxford University Press journal article supplement (doi:10.1093/rfs/hhv130), 2016-01-14
Supplement: hhv130-disclosure_statement.pdf [file hhv130-disclosure_statement.pdf]

## **Disclosure Statement as of January 6, 2016 for John M. Griffin for “Who Facilitated Misreporting in Securitized Loans?”**

### *Sources of funding*

*On acceptance, authors will be asked to provide a statement declaring all sources of outside funding relating to their paper, and the statement will be printed on the title page or at the end of their paper.*

All data was purchased by John Griffin through Integra FEC LLC, a Texas LLC of which he is the majority owner.

### **Additional Disclosures**

- *Each author of a submitted article should identify each interested party from whom he or she has received significant financial support, summing to at least \$10,000 in the past three years or that will exceed this threshold under contracts in place at the time of submission. Support includes financial support (e.g., consulting fees, retainers, grants, research support, equity shares or stock options, and the like), and in-kind support (e.g., access to data). An interested party is any individual, group, organization, or business entity that has a stake (e.g., financial, political, regulatory, etc.) related to the article.”*

John M. Griffin is an owner/CEO of Integra FEC LLC and Integra REC LLC, which engage in litigation consulting on a variety of issues including RMBS fraud. The mission of these companies is to expose darkness and to aid the defrauded in the financial sector. This is also the goal of this paper.

Integra FEC LLC’s clients over the last few years have been:

Two Federal agencies, one state agency, and a large plaintiff firm.

For the latter two clients, Integra FEC LLC has engaged in consulting on RMBS fraud.

Integra REC LLC’s clients have primarily been pension funds.

Currently, Integra REC LLC is engaged as a party to lawsuits regarding mortgage fraud. Two are public (*Tennessee Consolidated Retirement Systems v. J.P Morgan Securities LLC et al.* and *Commonwealth of Virginia ex rel. Integra REC LLC v. Barclays Capital Inc., et al.*). In these lawsuits Integra REC is alleging that pension funds were defrauded through mortgage fraud. Since Integra REC is a party to the litigation, it will receive a percentage of recoveries as payment for its work in the event of any settlements or judgements.

- *Each author should disclose any and all paid or unpaid positions as an officer, director, corporate advisor, or board member of relevant non--profit organizations or profit--making entities. A “relevant” organization is one whose policy positions, goals, or financial interests relate to the article.*

Griffin is an owner/CEO of Integra FEC LLC and Integra REC LLC.

- *The disclosures required above apply to any close relative or partner of any author.*

I am not aware of any close relatives who consult on issues related to this paper.

- *Each author must disclose if another party had the right to review the paper prior to its circulation.*

No third-party had a right to review the paper.

- *If any support provided to an author by an interested party is subject to any non-disclosure obligation, this fact must be disclosed to the Journal along with the nature of the conflict.*

The names of and specific contractual arrangements with the clients of Integra FEC LLC and the sealed (non-public) legal actions of Integra REC LLC are either confidential by state statute or subject to non-disclosure agreements.

## **Disclosure Statement as of January 6, 2016 for Gonzalo Maturana for “Who Facilitated Misreporting in Securitized Loans?”**

### *Sources of funding*

*On acceptance, authors will be asked to provide a statement declaring all sources of outside funding relating to their paper, and the statement will be printed on the title page or at the end of their paper.*

All data was purchased by John Griffin through Integra FEC LLC, a Texas LLC of which he is the majority owner.

### **Additional Disclosures**

- (1) *Each author of a submitted article should identify each interested party from whom he or she has received significant financial support, summing to at least \$10,000 in the past three years or that will exceed this threshold under contracts in place at the time of submission. Support includes financial support (e.g., consulting fees, retainers, grants, research support, equity shares or stock options, and the like), and in-kind support (e.g., access to data). An interested party is any individual, group, organization, or business entity that has a stake (e.g., financial, political, regulatory, etc.) related to the article.*

I have nothing to disclose.

- (2) *Each author should disclose any and all paid or unpaid positions as an officer, director, corporate advisor, or board member of relevant non-profit organizations or profit-making entities. A “relevant” organization is one whose policy positions, goals, or financial interests relate to the article.*

I have nothing to disclose. I do not work for Integra and have not being involved in any consulting.

- (3) *The disclosures required above apply to any close relative or partner of any author.*

I am not aware of any close relatives who consult on issues related to this paper.

- (4) *Each author must disclose if another party had the right to review the paper prior to its circulation.*

No third-party had a right to review the paper.

- (5) *If any support provided to an author by an interested party is subject to any non-disclosure obligation, this fact must be disclosed to the Journal along with the nature of the conflict.*

I have nothing to disclose.
